# Supplementary material for: Immobilization of a chiral rhodium catalyst on carbon nanotubes via non-covalent interaction for heterogeneous asymmetric hydrogenation
Source: Royal Society of Chemistry journal article supplement (doi:10.1039/d4cy01457j), 2025-01-01
Supplement: d4cy01457j1.pdf [file d4cy01457j1.pdf]

## Supporting Information

### **Immobilization of a chiral rhodium catalyst on carbon nanotubes via non-covalent interactions for heterogeneous asymmetric hydrogenation**

**Zinnia Arora,<sup>a,b</sup> Vasile I. Pârvulescu,<sup>b</sup> Karine Philippot,<sup>a</sup> Jérôme Durand,<sup>a</sup> and Maryse Gouygou<sup>\*a</sup>**

<sup>a</sup> Laboratoire de Chimie de Coordination du CNRS, Université de Toulouse, UPS, Toulouse-INP, 205 route de Narbonne, BP 44099, F-31077 Toulouse Cedex 4, France

<sup>b</sup> Department of Organic Chemistry, Biochemistry and Catalysis, University of Bucharest, 4-12 Regina Elisabeta Avenue, S3, 030018, Bucharest, Romania

\* Corresponding author: maryse.gouygou@lcc-toulouse.fr

#### **Table of Contents**

1. NMR data of the (2*S*,4*S*)-PPM-pyrene ligand.
2. Comparison of <sup>31</sup>P{<sup>1</sup>H} NMR data of (2*S*,4*S*)-PPM-pyrene ligand and [Rh(COD)((2*S*,4*S*)-PPM-pyrene)]BF<sub>4</sub> complex.
3. Immobilization of [Rh(COD)((2*S*,4*S*)-PPM-pyrene)]BF<sub>4</sub> *via* non-covalent π-π interaction
4. FTIR spectra of the CNTs and CNT@complex Rh
5. Raman spectra of the CNTs and CNT@complex Rh
6. N<sub>2</sub> adsorption-desorption isotherms of CNTs and CNT@complex Rh
7. XPS data of the fresh CNT@complex Rh
8. GC analysis of catalysis by CNT@complex Rh
9. FTIR spectra of fresh and spent CNT@complex Rh
10. XPS data of Rh for the fresh and spent CNT@complex Rh

Chemical structure of (2S,4S)-PPM-pyrene is shown. The structure consists of a pyrene moiety attached to a 1,3-bis(phenylthio)propane backbone. The pyrene moiety is attached to the 1,3-bis(phenylthio)propane backbone via a pyridine ring. The pyrene moiety is attached to the 1,3-bis(phenylthio)propane backbone via a pyridine ring. The pyrene moiety is attached to the 1,3-bis(phenylthio)propane backbone via a pyridine ring.

$^1\text{H}$  NMR spectrum of (2S,4S)-PPM-pyrene in  $\text{CDCl}_3$ . The spectrum shows peaks for the pyrene moiety (7.05, 9.58 ppm), the PPM backbone (22.93, 23.41 ppm), and the pyridine ring (7.2-8.5 ppm). The chemical structure of (2S,4S)-PPM-pyrene is shown, featuring a pyrene group attached to a 1,3-bis(phenylthio)propane backbone. The x-axis is labeled f1 (ppm) and ranges from 5 to -30. The y-axis is labeled intensity. The peaks are assigned to the major conformer (blue stars) and the minor conformer (red circles).

Major conformer

Minor conformer

**Figure S2:**  $^1\text{H}$ ,  $^{31}\text{P}$ , and  $^{13}\text{C}$ -chemical shifts of the (2*S*,4*S*)-PPM-pyrene ligand. Attribution made by  $^1\text{H}$ ,  $^1\text{H}\{^{31}\text{P}\}$  select and broadband,  $^{13}\text{C}\{^1\text{H}\}$ ,  $^{13}\text{C}\{^1\text{H}\}$ ,  $\{^{31}\text{P}\}$  COSY, HSQC, HMBC ROESY, HMQC  $^1\text{H}$ - $^{31}\text{P}$  on a Bruker Avance NEO 600. The majority of the protons and carbons of each conformer, including those of the pyrene group were assigned except the protons and carbons of the phenyl groups which are too overlapping to be unambiguously assigned.

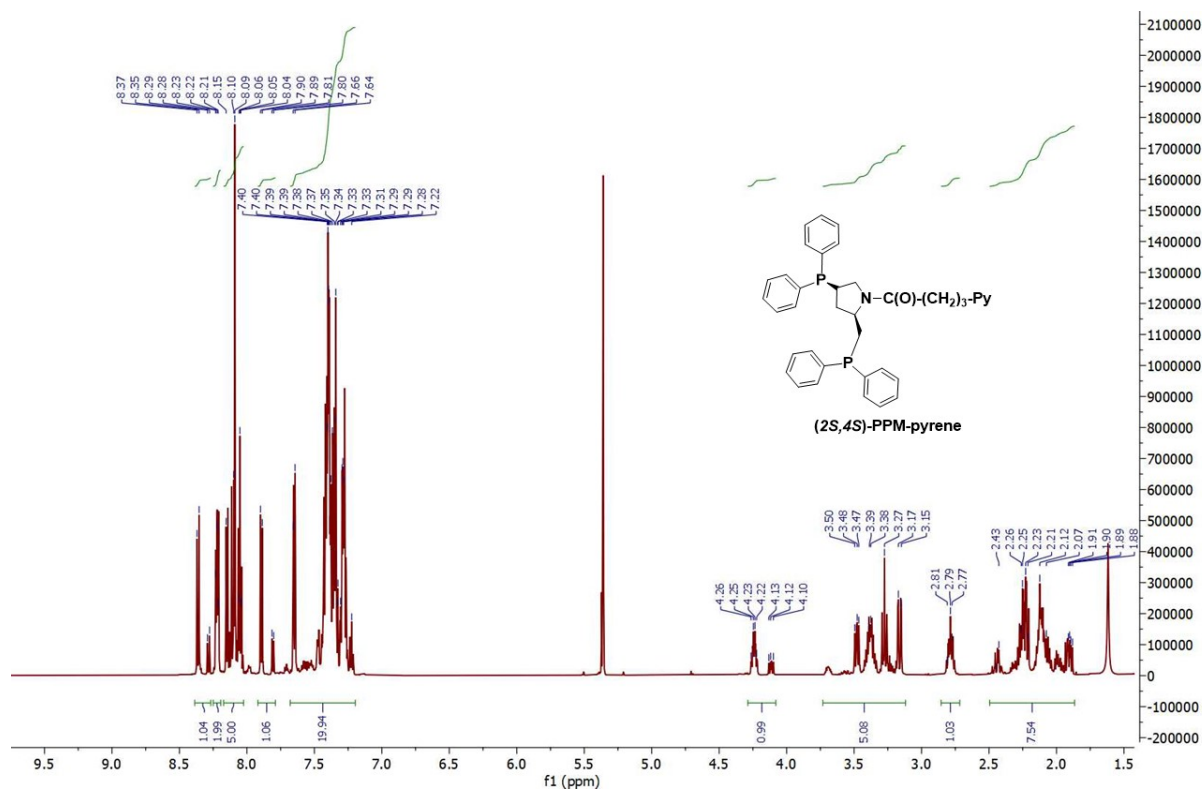

**Figure S3:** <sup>1</sup>H NMR spectrum of the (2*S*,4*S*)-PPM-pyrene ligand.

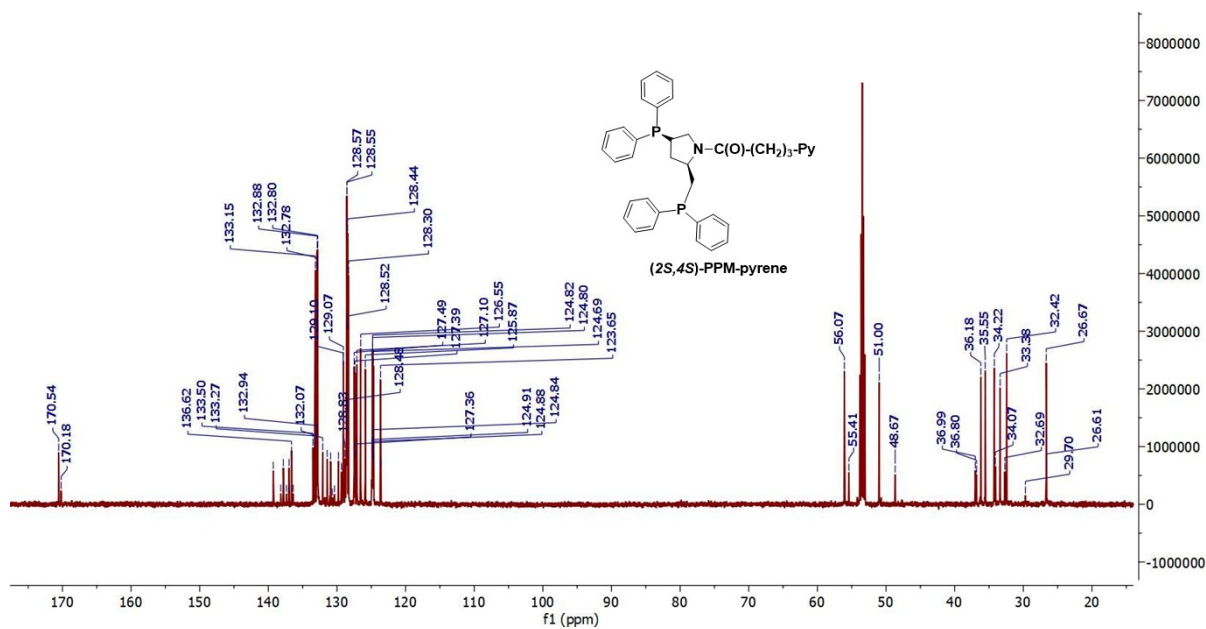

**Figure S4:** <sup>13</sup>C NMR spectrum of the (2*S*,4*S*)-PPM-pyrene ligand.

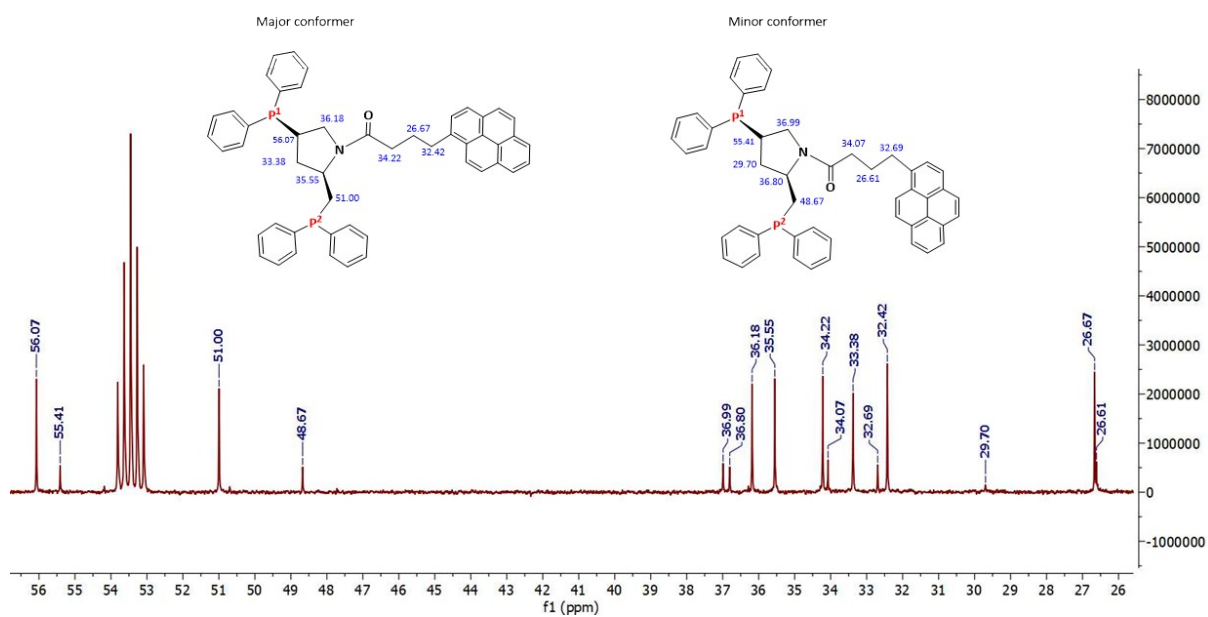

**Figure S5:** Zoom spectrum of aliphatic carbons of the  $(2S,4S)$ -PPM-pyrene ligand.

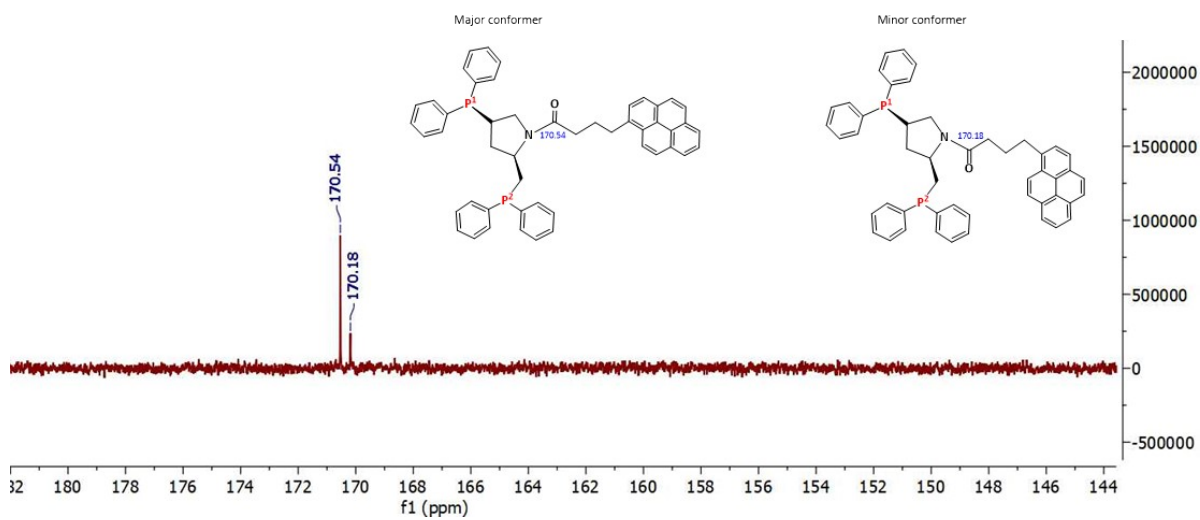

**Figure S6:** Zoom spectrum of carbonyl carbons of the  $(2S,4S)$ -PPM-pyrene ligand.

2. Comparison of  $^{31}\text{P}\{^1\text{H}\}$  NMR data of (2*S*,4*S*)-PPM-pyrene ligand and  $[\text{Rh}(\text{COD})((2*S*,4*S*)\text{-PPM-pyrene})]\text{BF}_4$  complex.

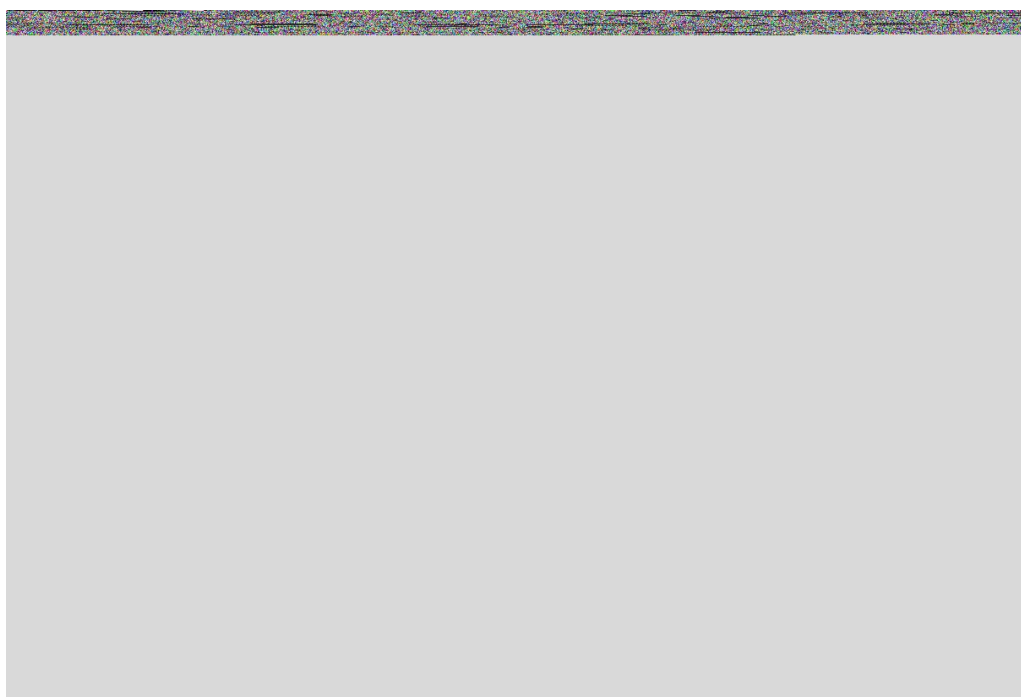

**Figure S7:**  $^{31}\text{P}\{^1\text{H}\}$  NMR spectra of (2*S*,4*S*)-PPM-pyrene ligand (bottom, red) and  $[\text{Rh}(\text{COD})((2*S*,4*S*)\text{-PPM-pyrene})]\text{BF}_4$  complex (top, blue).

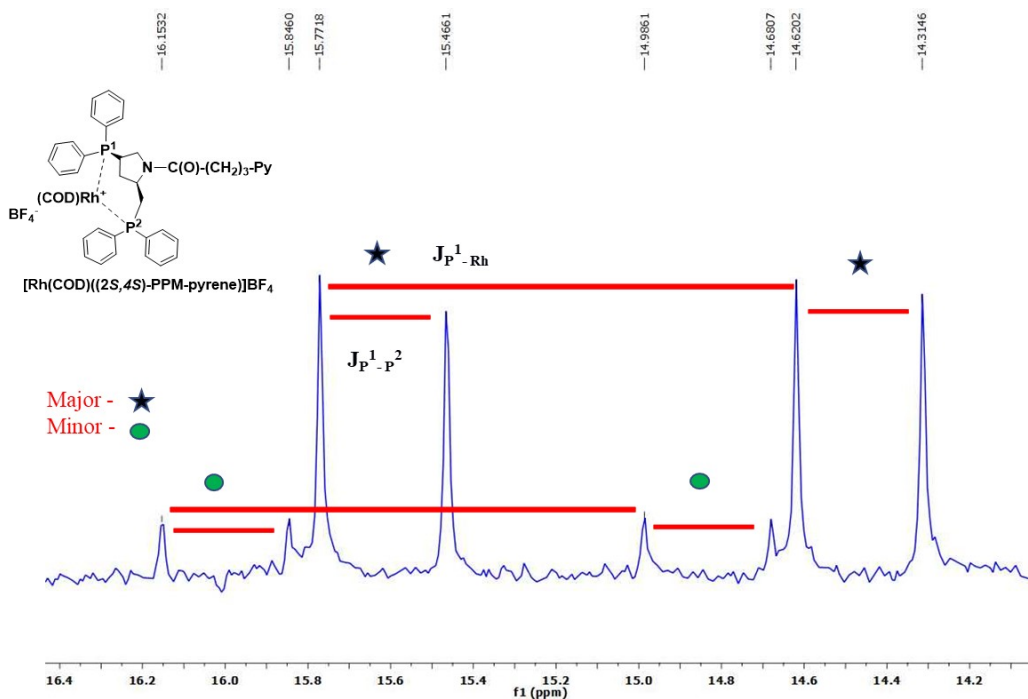

**Figure S8:** Zoom of  $^{31}\text{P}\{^1\text{H}\}$  spectrum of the  $[\text{Rh}(\text{COD})((2*S*,4*S*)\text{-PPM-pyrene})]\text{BF}_4$  complex showing the couplings of  $\text{P}^1$  with Rh and  $\text{P}^2$  in the major and minor isomers.

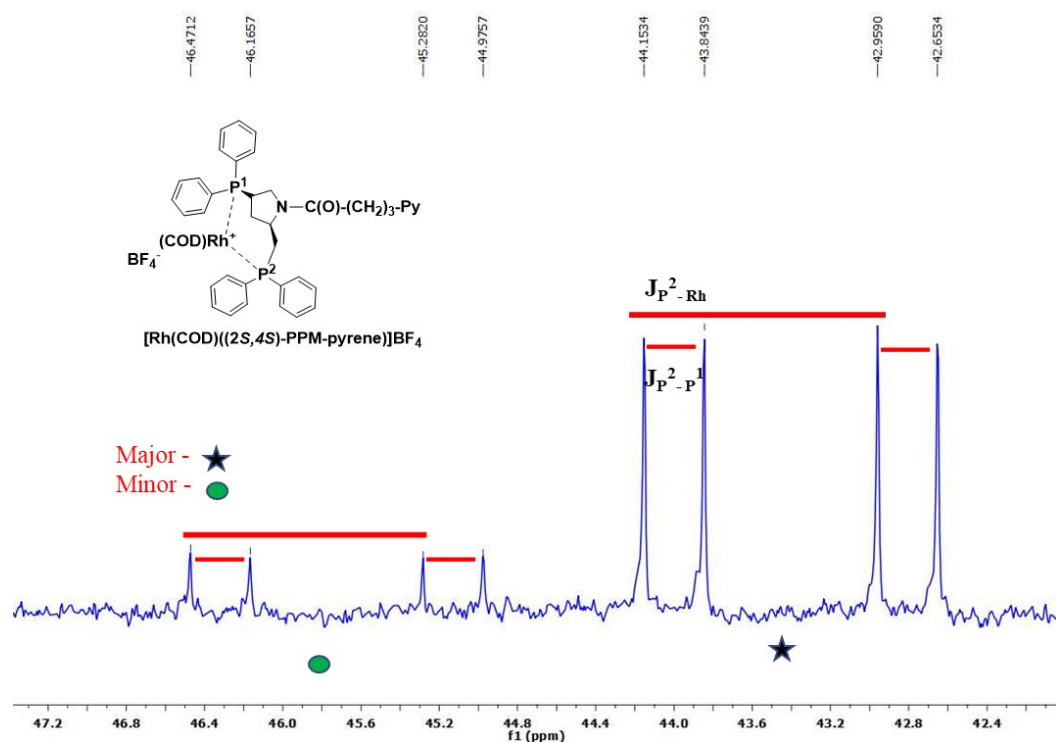

**Figure S9:** Zoom of  $^{31}\text{P}\{^1\text{H}\}$  spectrum of the  $[\text{Rh}(\text{COD})((2S,4S)\text{-PPM-pyrene})]\text{BF}_4$  complex showing the couplings  $\text{P}^2$  with Rh and  $\text{P}^1$  in the major and minor isomers.

### 3. Immobilization of $[\text{Rh}(\text{COD})((2S,4S)\text{-PPM-pyrene})]\text{BF}_4$ via non-covalent $\pi\text{-}\pi$ interaction

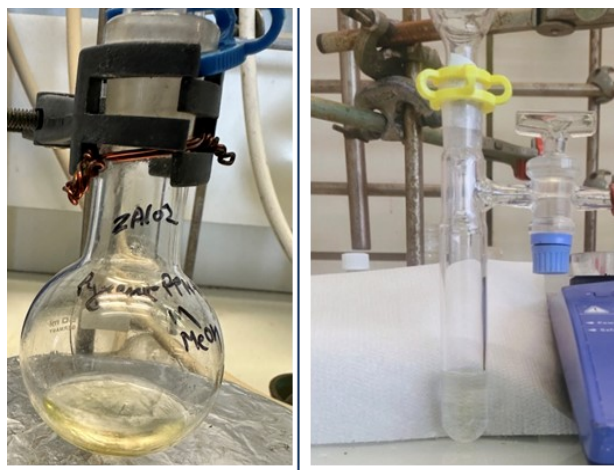

**Figure S10:** The adsorption of chiral **complex Rh** onto CNTs in MeOH: homogeneous complex solution (left), and the filtrate after immobilization of complex on CNTs (right).

#### 4. FTIR spectra of CNTs and CNT@complex Rh.

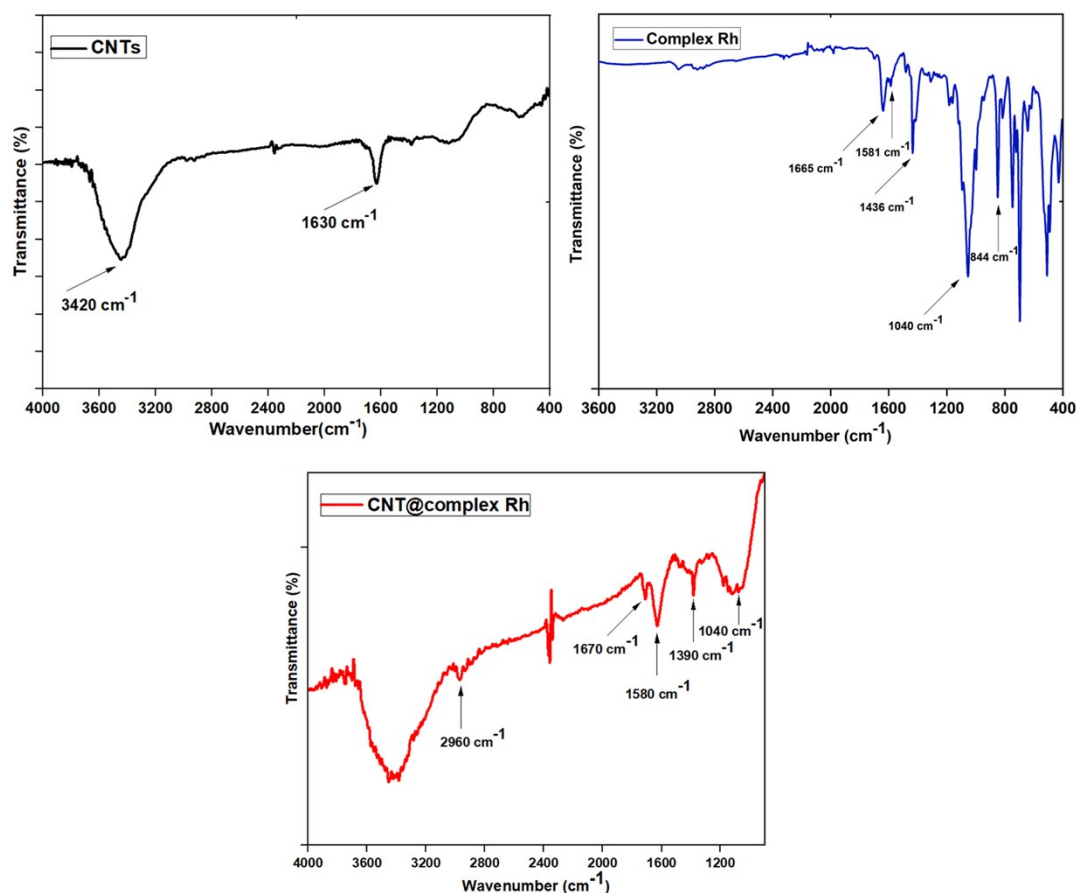

Figure S11: FTIR spectra of the CNTs and CNT@complex Rh.

#### 5. Raman spectra of the CNTs and CNT@complex Rh.

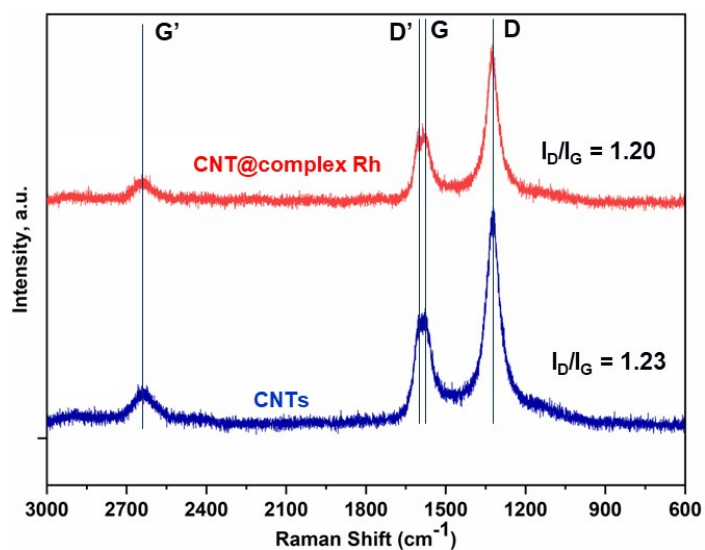

Figure S12: Raman spectra of the CNTs (blue) and CNT@complex Rh (red).

6.  $N_2$  adsorption-desorption isotherms of CNTs and CNT@complex Rh

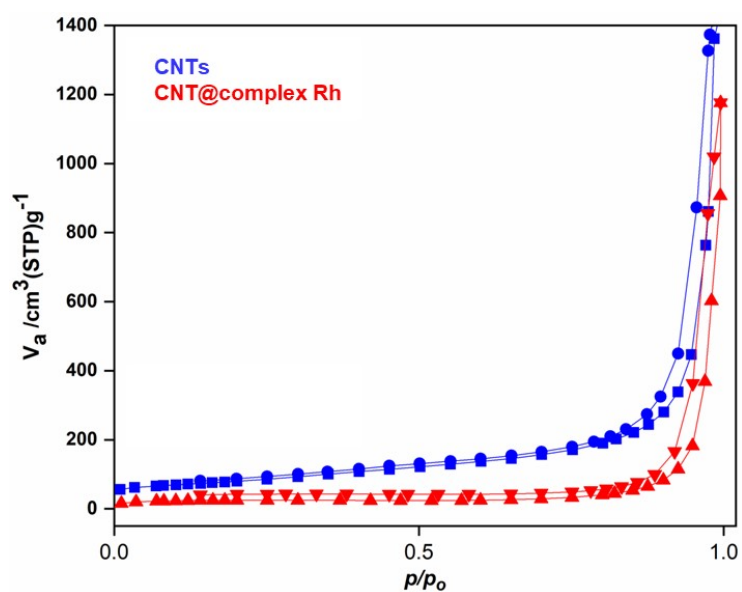

Figure S13:  $N_2$  adsorption-desorption isotherms of CNTs (blue) and CNT@complex Rh (red).

7. XPS data of the fresh CNT@complex Rh

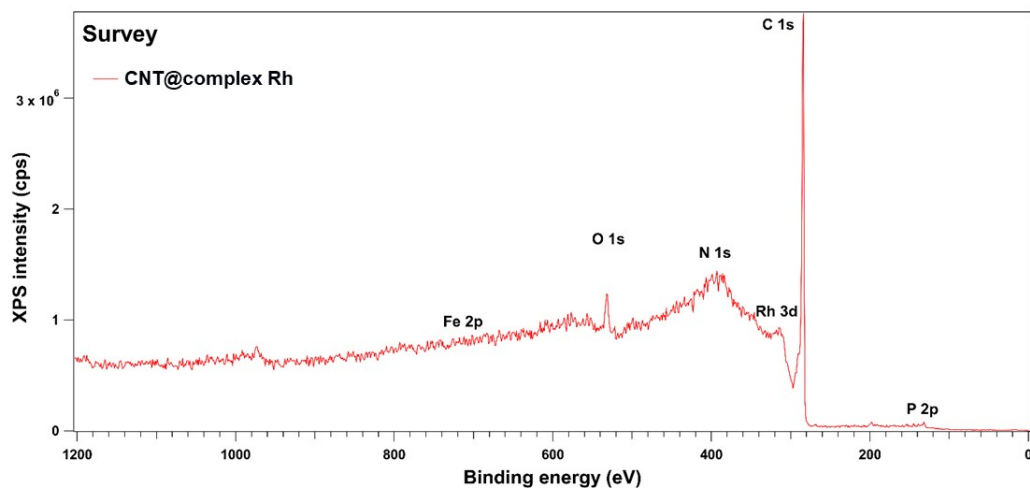

Figure S14: XPS survey of the elements in fresh CNT@complex Rh.



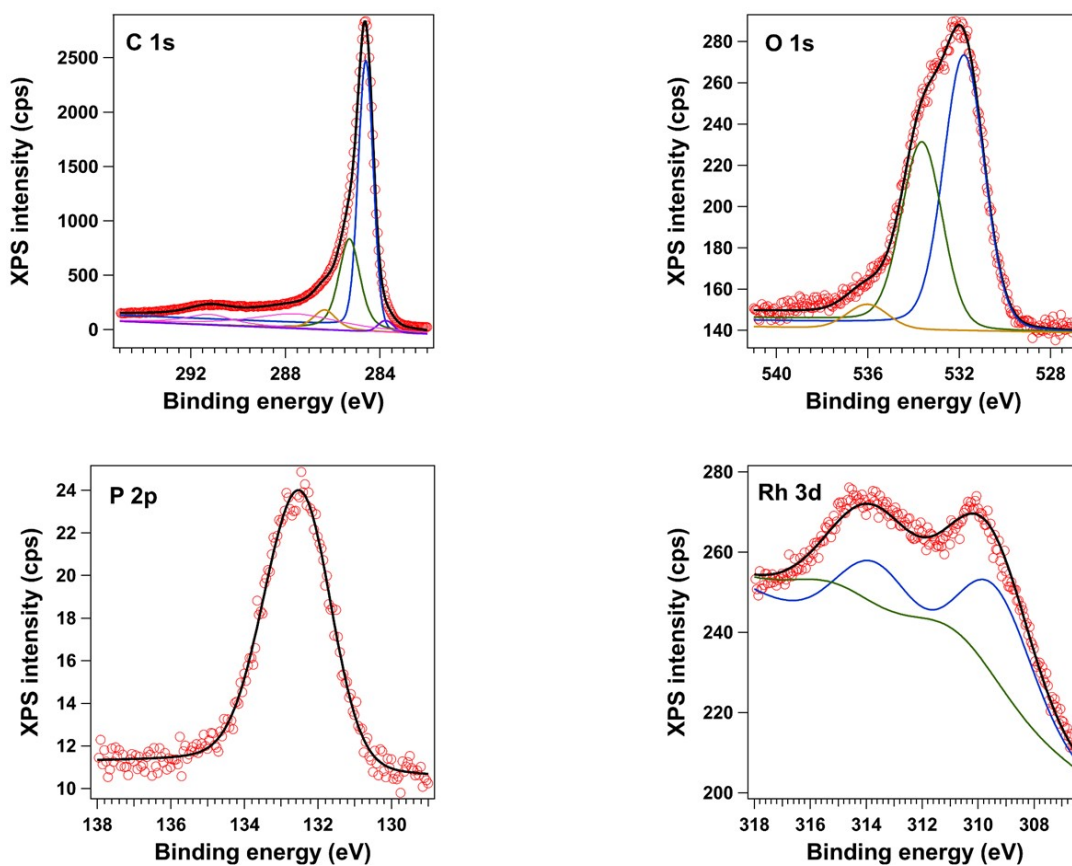

**Figure S15:** XPS analysis of the elements present in **CNT@complex Rh**. (red: experimental data, black: fitting, blue and green: deconvolution).

**Table S1:** XPS binding energies and Rh/P atomic ratio for the **CNT@complex Rh**.

|                   | Binding energy (eV) |       |                   |               |
|-------------------|---------------------|-------|-------------------|---------------|
| Catalyst          | O1s                 | C1s   | P2p               | Rh3d          |
| CNT@complex Rh    | 531.7               | 284.8 | 132.3             | 309.6 + 313.8 |
|                   | 533.3               | 285.3 |                   | 310.5 + 315.0 |
|                   | 536.0               | 286.3 |                   |               |
|                   |                     | 287   |                   |               |
|                   |                     | 290.8 |                   |               |
| Rh/P atomic ratio |                     |       |                   |               |
|                   | XPS value           |       | Theoretical value |               |
| CNT@complex Rh    | 0.52                |       | 0.50              |               |

## 8. GC analysis of catalysis by CNT@complex Rh.

**Table S2: GC analysis of catalysis result for the enantioselective hydrogenation of dimethyl itaconate by CNT-immobilized Rh complex (entry 3 of Table 1).**

|                       |                         |                 |                         |
|-----------------------|-------------------------|-----------------|-------------------------|
| Software Version      | : 6.3.2.0646            | Date            | : 2/25/2022 10:41:45 AM |
| Operator              | : TPROCESS              | Sample Name     | :                       |
| Sample Number         | :                       | Study           | :                       |
| AutoSampler           | : NONE                  | Rack/Vial       | : 0/0                   |
| Instrument Name       | : CLARUS 580            | Channel         | : A                     |
| Instrument Serial #   | : 580S12101703          | A/D mV Range    | : 1000                  |
| Delay Time            | : 0.00 min              | End Time        | : 30.00 min             |
| Sampling Rate         | : 12.5000 pts/s         |                 |                         |
| Sample Volume         | : 1.000000 ul           | Area Reject     | : 0.000000              |
| Sample Amount         | : 1.0000                | Dilution Factor | : 1.00                  |
| Data Acquisition Time | : 2/23/2022 11:45:32 AM | Cycle           | : 1                     |

Raw Data File : C:\Clarus580\DATA\Zinnia\ZA79\_90.raw  
 Result File : C:\Clarus580\DATA\Zinnia\ZA79\_90.rst [Editing in Progress]  
 Inst Method : C:\Clarus580\METHOD\Laurent\Methode colonne chirale Maryse fev2022 Modif test from C:\Clarus580\DATA\Zinnia\ZA79\_90.raw  
 Proc Method : C:\Clarus580\METHOD\Laurent\Methode colonne chirale Maryse fev2022 Modif test from C:\Clarus580\DATA\Zinnia\ZA79\_90.rst [Editing in Progress]  
 Calib Method : C:\Clarus580\METHOD\Laurent\Methode colonne chirale Maryse fev2022 Modif test from C:\Clarus580\DATA\Zinnia\ZA79\_90.rst [Editing in Progress]  
 Report Format File: C:\Clarus580\METHOD\Laurent\Methode colonne chirale Maryse fev2022 Modif test.rpt  
 Sequence File : C:\AUTOSYSTEM\XL\SEQUENCE\ZA79\_90.seq

## DEFAULT REPORT

| Peak # | Time [min] | Area [μV·s] | Height [μV] | Area [%] | Norm. Area [%] | BL | Area/Height [s] |
|--------|------------|-------------|-------------|----------|----------------|----|-----------------|
| 1      | 0.764      | 54071.02    | 46441.07    | 0.90     | 0.90           | BV | 1.1643          |
| 2      | 0.806      | 393901.29   | 106733.85   | 6.57     | 6.57           | VV | 3.6905          |
| 3      | 0.853      | 85904.45    | 79489.69    | 1.43     | 1.43           | VV | 1.0807          |
| 4      | 0.878      | 156542.94   | 84521.51    | 2.61     | 2.61           | VV | 1.8521          |
| 5      | 0.903      | 29653.46    | 61845.76    | 0.49     | 0.49           | VV | 0.4795          |
| 6      | 0.920      | 4861470.14  | 988672.15   | 81.11    | 81.11          | VE | 4.9172          |
| 7      | 1.103      | 4043.73     | 1526.98     | 0.07     | 0.07           | EV | 2.6482          |
| 8      | 1.204      | 189.42      | 208.49      | 0.00     | 0.00           | VB | 0.9086          |
| 9      | 1.314      | 450.87      | 240.97      | 0.01     | 0.01           | BV | 1.8710          |
| 10     | 1.386      | 109.23      | 73.54       | 0.00     | 0.00           | VB | 1.4853          |
| 11     | 1.705      | 591.21      | 228.39      | 0.01     | 0.01           | BB | 2.5885          |
| 12     | 1.867      | 240.80      | 88.35       | 0.00     | 0.00           | BB | 2.7257          |
| 13     | 2.051      | 709.10      | 244.46      | 0.01     | 0.01           | BB | 2.9006          |
| 14     | 2.161      | 3433.46     | 1929.70     | 0.06     | 0.06           | BV | 1.7793          |
| 15     | 2.249      | 162.31      | 76.50       | 0.00     | 0.00           | VB | 2.1217          |
| 16     | 4.656      | 218.19      | 73.41       | 0.00     | 0.00           | BB | 2.9722          |
| 17     | 7.812      | 603.57      | 127.21      | 0.01     | 0.01           | BV | 4.7447          |
| 18     | 7.945      | 76427.56    | 11037.13    | 1.28     | 1.28           | VV | 6.9246          |
| 19     | 8.334      | 37390.11    | 4998.38     | 0.62     | 0.62           | VB | 7.4804          |
| 20     | 11.544     | 285505.02   | 29549.25    | 4.76     | 4.76           | BE | 9.6620          |
| 21     | 11.941     | 1801.68     | 222.44      | 0.03     | 0.03           | EB | 8.0995          |
| 22     | 12.050     | 35.52       | 72.10       | 0.00     | 0.00           | BB | 0.4926          |
| 23     | 12.067     | 60.02       | 78.61       | 0.00     | 0.00           | BB | 0.7635          |
| 24     | 12.092     | 55.78       | 82.34       | 0.00     | 0.00           | BB | 0.6774          |
| 25     | 12.112     | 38.09       | 67.90       | 0.00     | 0.00           | BB | 0.5610          |
|        |            | 5993608.95  | 1.42e+06    | 100.00   | 100.00         |    |                 |

The retention times for the produced methyl succinate were 7.9 and 8.3 min for the (*S*) and (*R*) forms, respectively, and 11.5 min for dimethyl itaconate.

$R = 0.62$

$S = 1.28$

Reactant = 4.76

$$\% \text{ Conversion} = 100 - \frac{\text{Area of Reactant}}{\text{Total area}} * 100$$

$$\% \text{ Conversion} = 100 - \frac{4.76}{4.76 + 1.28 + 0.62} * 100$$

$$\% \text{ Conversion} = 100 - \frac{4.76}{4.76 + 1.28 + 0.62} * 100$$

$$\% \text{ Conversion} = 29$$

$$R = 0.62$$

$$S = 1.28$$

$$\% ee = \frac{|R - S|}{R + S} * 100$$

$$\% ee = \frac{|0.62 - 1.28|}{0.62 + 1.28} * 100$$

$$\% ee = 34 (S)$$

## 9. FTIR spectra of fresh and spent CNT@complex Rh catalyst.

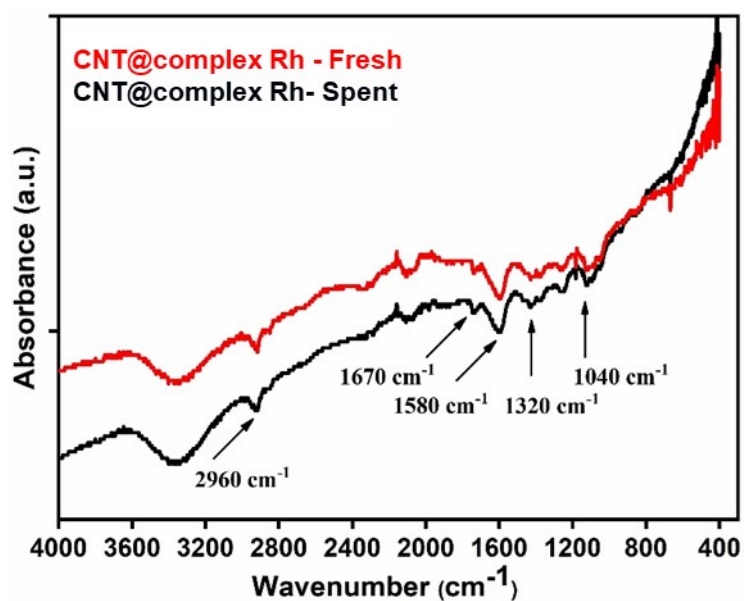

**Figure S16:** FTIR spectra of fresh (red) and spent (black) CNT@complex Rh catalyst.

10. XPS spectra of Rh for the fresh and spent of CNT@complex Rh.

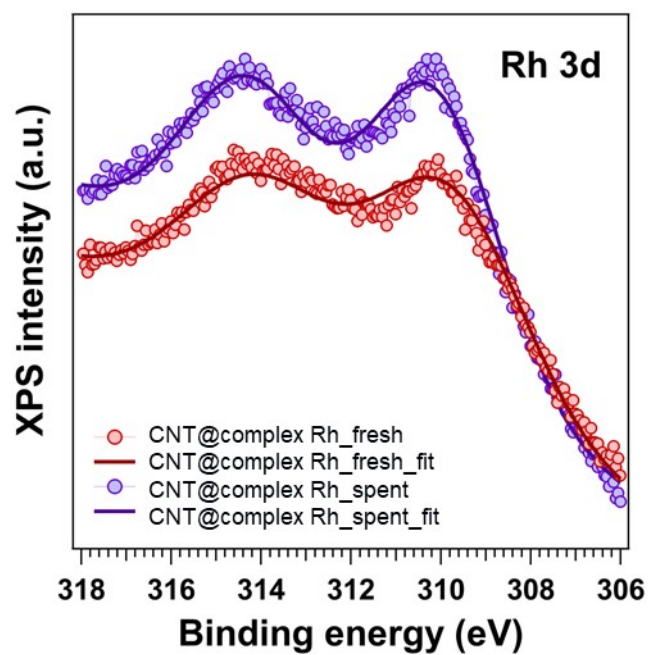

**Figure S17:** XPS spectra of Rh for the fresh (red) and spent (violet) CNT@complex Rh.
